# Supplementary material
Source: Springer Nature journal article supplement (https://www.springermedizin.de/resource/supplementary/12874_2005_147_MOESM1_ESM.pdf/9433866)
Supplement: MOESM1 [file 9433866]

***Search Approach 1: Searching with text words in the title and abstract***

**DARE searched via CRD website at <http://www.york.ac.uk/inst/crd/>**

**Searched: 31/03/05**

(safe or safety or adverse or tolerability or toxicity or toxic or adrs or adr or tolerance or tolerate or harm or harms or harmful or complication\$ or risk or risks)/xoa OR side(w)effect\$/xoa OR undesirable(w)effect\$/xoa OR treatment(w)emergent/xoa OR

(safe or safety or adverse or tolerability or toxicity or toxic or adrs or adr or tolerance or tolerate or harm or harms or harmful or complication\$ or risk or risks)/ttl OR side(w)effect\$/ttl OR undesirable(w)effect\$/ttl OR treatment(w)emergent/ttl

**Key**

**/xoa** – restricts the search to the ‘outcomes assessed in the review’ field

**/ttl** – restricts the search to the ‘title’ field

**\$** - truncation symbol

**(w)** – words must be adjacent to each other

***Search Approach 2: Searching using indexing terms***

**DARE searched via the Cochrane Library at**

**<http://www.nelh.nhs.uk/cochrane.asp>**

**Issue 1 2005**

**Searched: 31/03/05**

#1 Any MeSH descriptor with qualifier: AE

#2 Any MeSH descriptor with qualifier: DE

#3 Any MeSH descriptor with qualifier: CO

#4 Any MeSH descriptor with qualifier: PO

#5 Any MeSH descriptor with qualifier: TO

#6 Any MeSH descriptor with qualifier: CI

#7 MeSH descriptor Drug Hypersensitivity explode all trees

#8 MeSH descriptor Drug Toxicity explode all trees

#9 MeSH descriptor Product Surveillance, Postmarketing explode all trees

#10 #1 or #2 or #3 or #4 or #5 or #6 or #7 or #8 or #9

**Key**

**Sets #1 to #6** are ‘floating’ subheadings

***Search Approach 3: Searching ‘provisional’ abstracts***

All records in progress, ‘provisional’ abstracts, were scanned for relevant reviews of adverse effects.
